# Supplementary material for: Hesperidin protects against cisplatin-induced cardiotoxicity in mice by regulating the p62–Keap1–Nrf2 pathway
Source: Royal Society of Chemistry journal article supplement (doi:10.1039/d2fo00298a), 2022-01-01
Supplement: d2fo00298a1.xlsx [file d2fo00298a1.xlsx]

## Sheet: Sheet1
Raw data
	Figure	2B		3B	3C	4B	5A	5B	5C	5D	6A	6B	7B	7C	7D	8B	8C	8D
Group	Number	Histopathologically damaged areas (%)	cTnI (ng/mL)	CK (KU/L)	LDH (KU/L)	ROS area (%)	SOD (U/mg)	CAT (U/g)	GSH (U/mg)	MDA (nmol/mg)	TNF-α (pg/mL)	IL-6 (pg/mL)	Bax /β-actin	Bcl-2 /β-actin	Caspase-3 /β-actin	p62 /β-actin	Keap1 /β-actin	Nrf2 /β-actin
CONT	1	2.43	1.33	0.2	1.49	3.12	82.66	131.31	48.71	4.07	90.48	20.74	0.67	1.23	0.65	1.36	0.5	1
	2	2.61	1.15	0.23	1.52	3.65	88.91	139.01	45.53	5.21	95.45	21.68	0.72	1.12	0.75	1.33	0.43	1.08
	3	3.08	1.27	0.19	1.45	3.38	76.87	155.33	49.22	5.02	103.54	19.29	0.82	1.11	0.61	1.1	0.42	0.84
	4		1.1	0.25	1.36		91.55	135.79	47.51	5.45	93.62	20.87
	5		1.3	0.21	1.4		96.02	144.4	47.99	4.89	97.91	23.27
	6		1.36	0.18	1.56		77.98	126.97	42.5	4.56	94.17	17.27
CP	1	14.32	2.44	0.54	2.73	10.4	60.34	92.22	24.53	10.71	200.83	45.95	1.2	0.62	1.37	0.68	1.43	0.5
	2	15.29	2.09	0.52	2.66	11.16	63.1441	87.48	29.61	9.56	193.79	36.63	1.29	0.5	1.45	0.67	1.42	0.43
	3	16.65	2.26	0.49	2.55	9.358	56.75	83.99	28.92	10.87	185.2	47.04	1.57	0.6	1.35	0.62	1.31	0.44
	4		2.32	0.46	2.62		54.48	90.01	25.88	9.45	171.79	39.55
	5		2.49	0.55	2.48		67.66	80.47	28.01	8.41	190.6	45.3
	6		2.17	0.47	2.8		62.73	95.78	26.24	10.32	182.81	49.47
L-HES	1	13.95	1.81	0.45	2.41	8.14	70.35	105.34	32.27	8.53	163.56	36.53	0.91	0.94	1.04	0.97	0.92	0.66
	2	14.7	1.94	0.47	2.36	7.84	74.9782	99.72	34.55	7.77	153.45	37.84	0.9	0.87	1.08	0.94	1.08	0.83
	3	12.44	1.67	0.39	2.22	8.87	77.3362	102.85	32.94	8.21	148.16	34.34	1.06	0.76	0.94	0.87	0.96	0.65
	4		1.73	0.49	2.17		65.5895	112.31	35.13	9.05	140.89	30.77
	5		1.77	0.44	2.26		76.42	107.23	30.77	8.86	156.72	32.24
	6		2	0.42	2.1		68.17	94.89	36.24	7.58	160.82	38.86
H-HES	1	8.37	1.66	0.28	1.88	6.79	75.58	115.77	39.85	6.31	120.51	27.15	0.7	1	0.84	1.09	0.71	0.88
	2	9.02	1.54	0.25	1.66	5.79	72.09	109.34	41.26	7.06	122.74	31.33	0.86	1.1	0.89	1.12	0.75	0.93
	3	9.85	1.4	0.3	1.83	6.16	80.91	121.98	43.79	5.91	117.72	24.5	0.85	0.83	0.71	0.97	0.61	0.77
	4		1.46	0.26	1.75		77.99	112.05	39.11	6.68	107.01	26.73
	5		1.72	0.32	1.72		73.17	128.36	44.64	5.73	113.69	25.38
	6		1.43	0.29	1.63		82.81	126.97	36.37	7.21	104.39	28.48
HES	1	3.11	1.48	0.26	1.61	3.71	78.03	133.89	42.45	5.21	91.55	21.23	0.58	1.19	0.72	1.38	0.52	1.01
	2	3.63	1.2	0.24	1.53	3.35	88.6	140.02	48.74	4.78	85.86	20.74	0.7	1.04	0.82	1.32	0.53	1.03
	3	2.87	1.26	0.25	1.38	3.09	90.6	126.62	45.49	4.27	89.69	24.4	0.6	0.95	0.68	1.14	0.41	0.9
	4		1.34	0.2	1.57		85.79	130.87	47.33	5.13	100.8	19.88
	5		1.17	0.27	1.45		79.48	136.05	50.19	4.1	94.07	18.27
	6		1.39	0.22	1.43		81.33	153.98	41.1	4.54	97.39	23.88
